# Supplementary figures and images for: Atypical protein kinase C controls sea urchin ciliogenesis
Source: PubMed Central journal article supplement — Mol Biol Cell. 2011 Jun 15;22(12):2042–53. doi: 10.1091/mbc.E10-10-0844 (PMC3113769; doi:10.1091/mbc.e10-10-0844), 2011-06-15

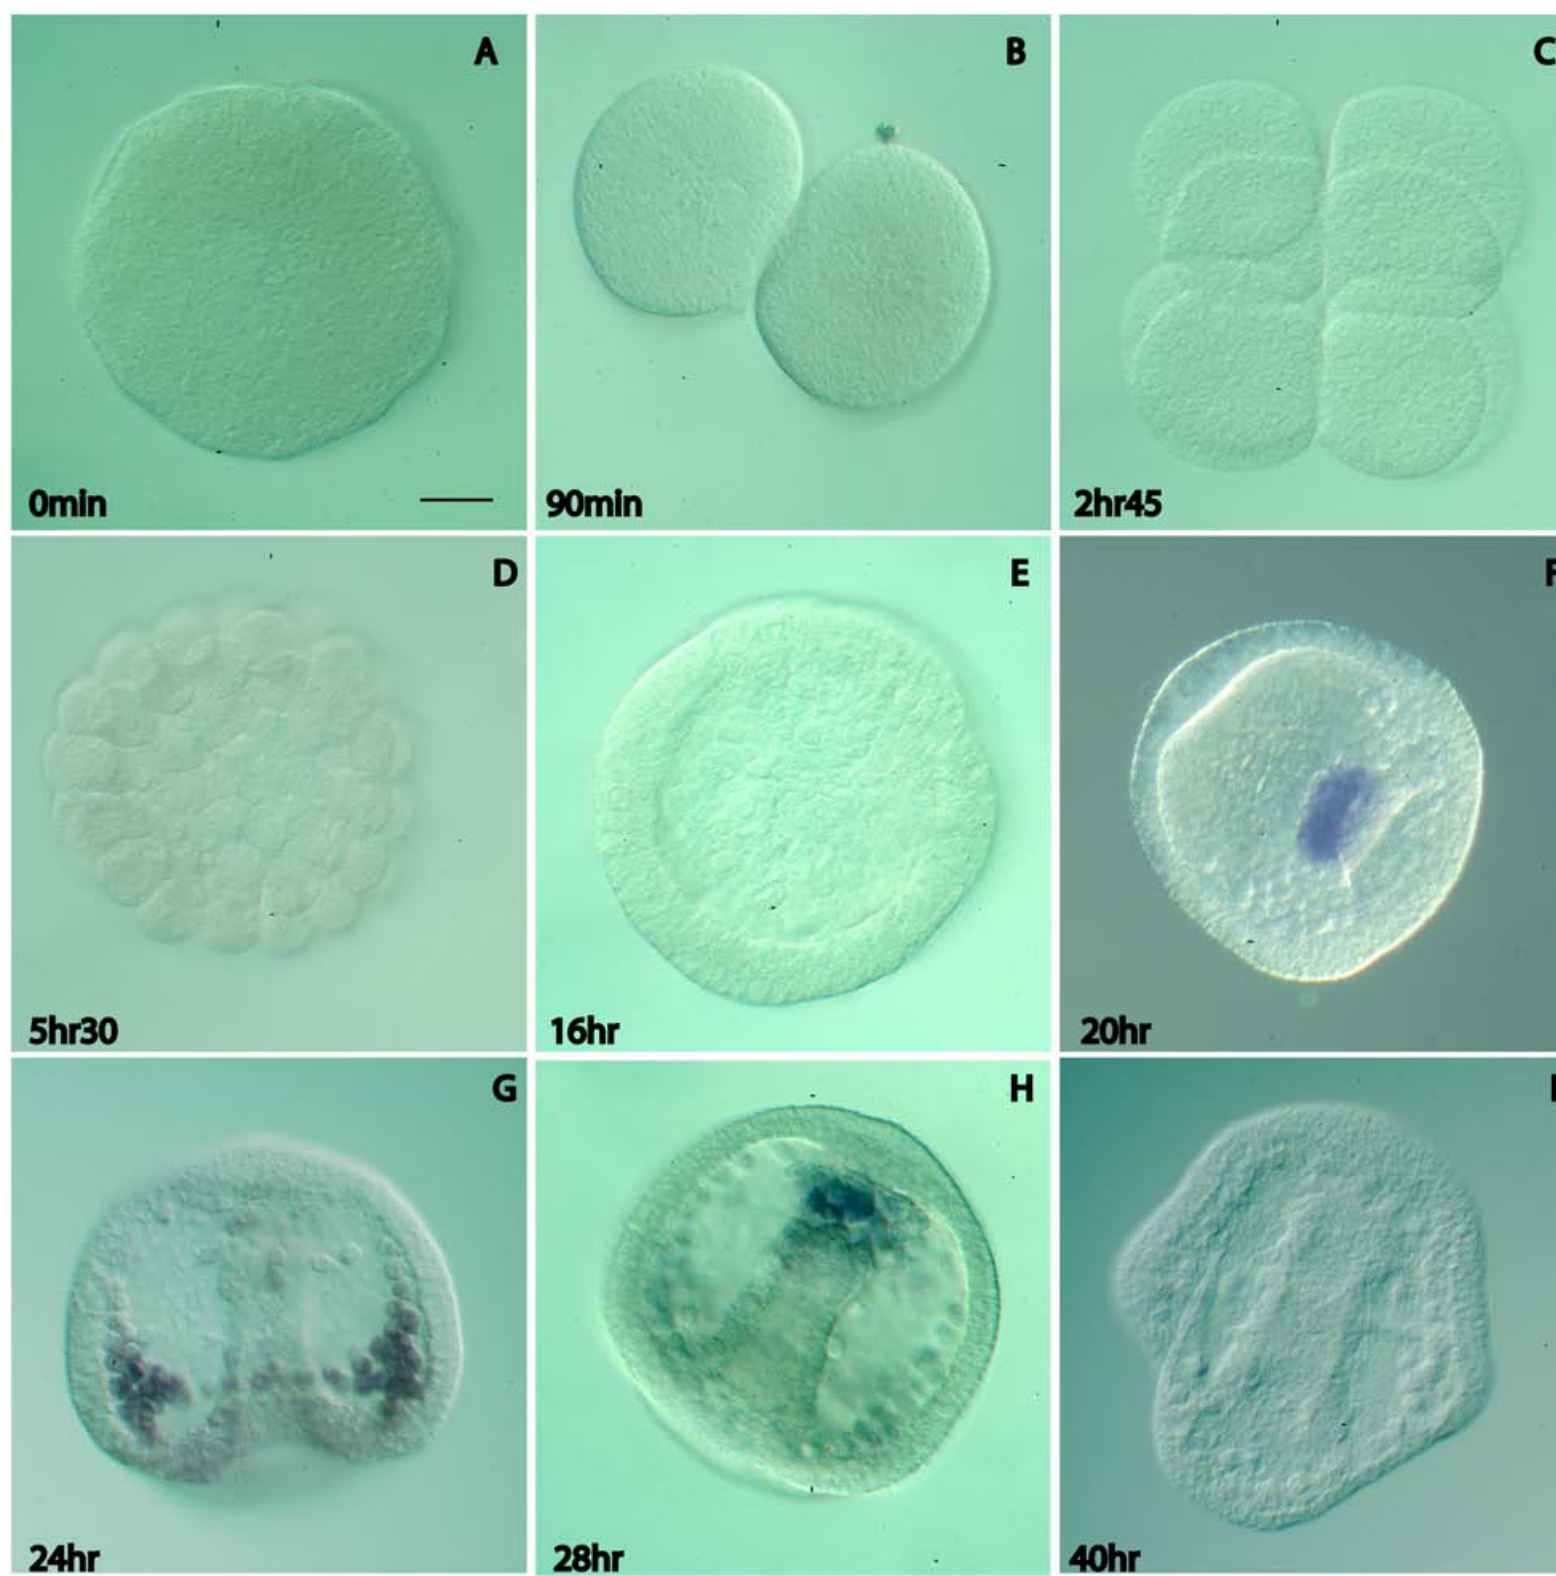

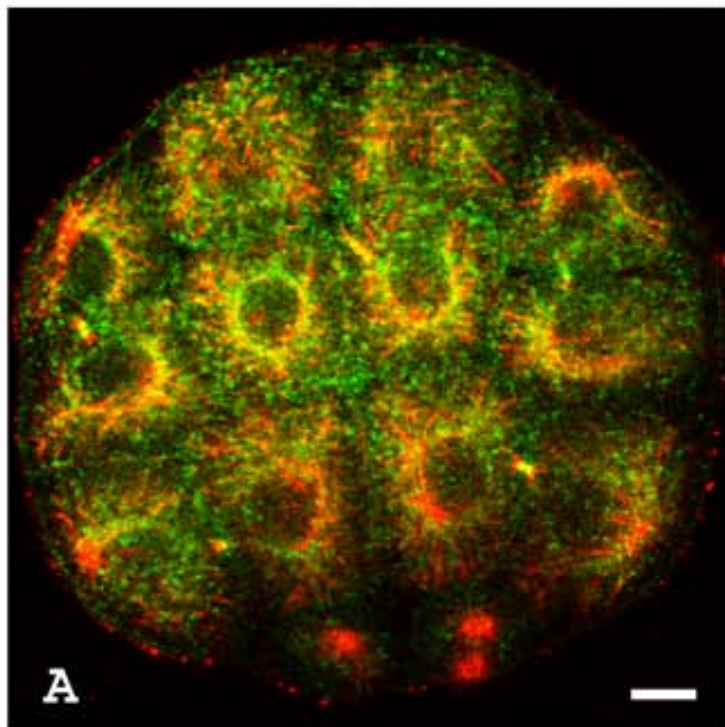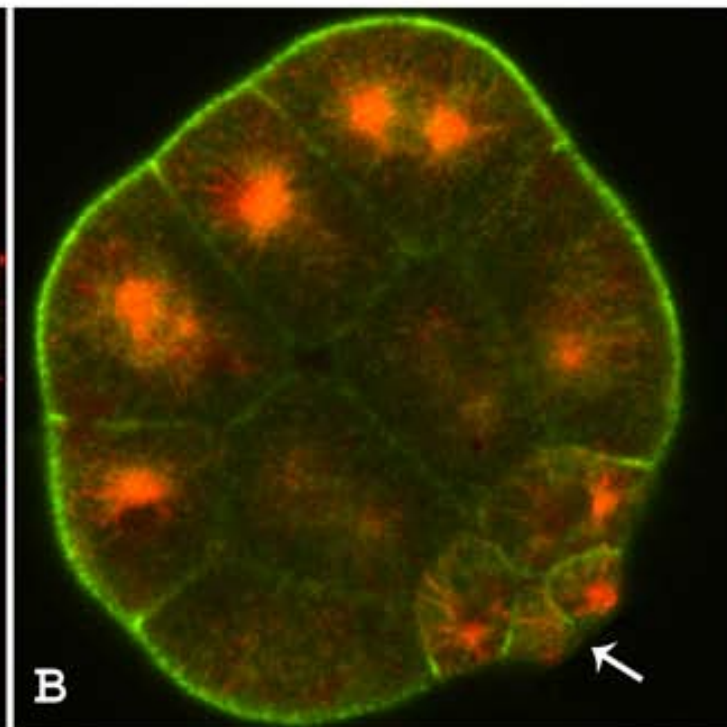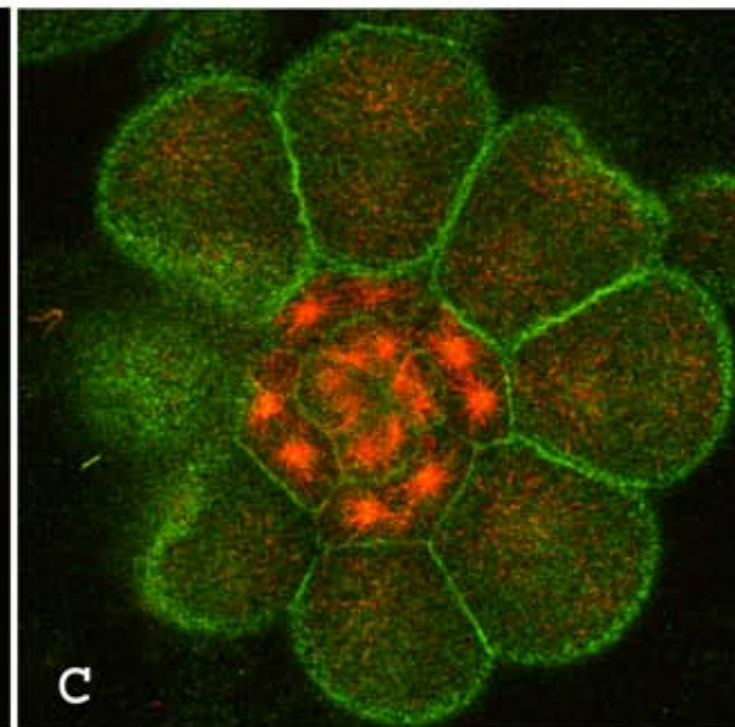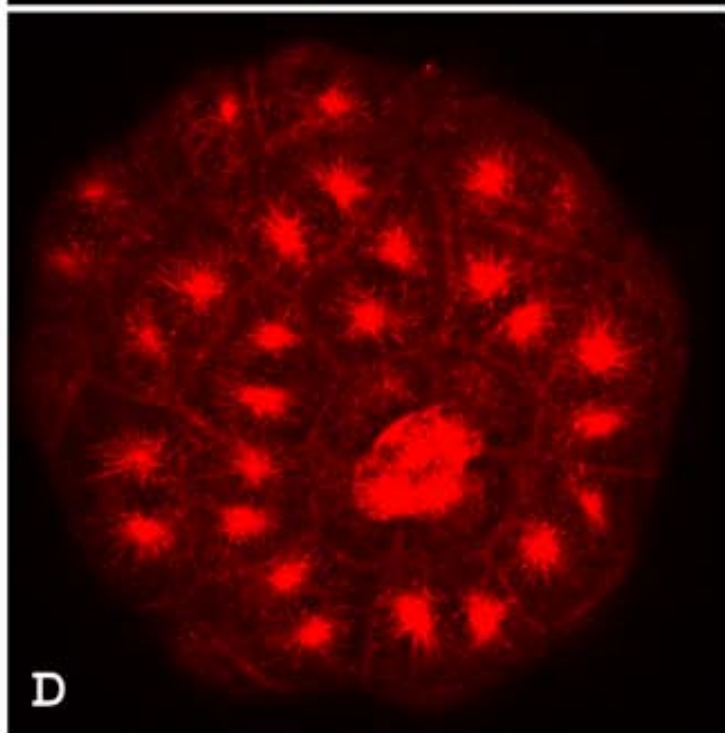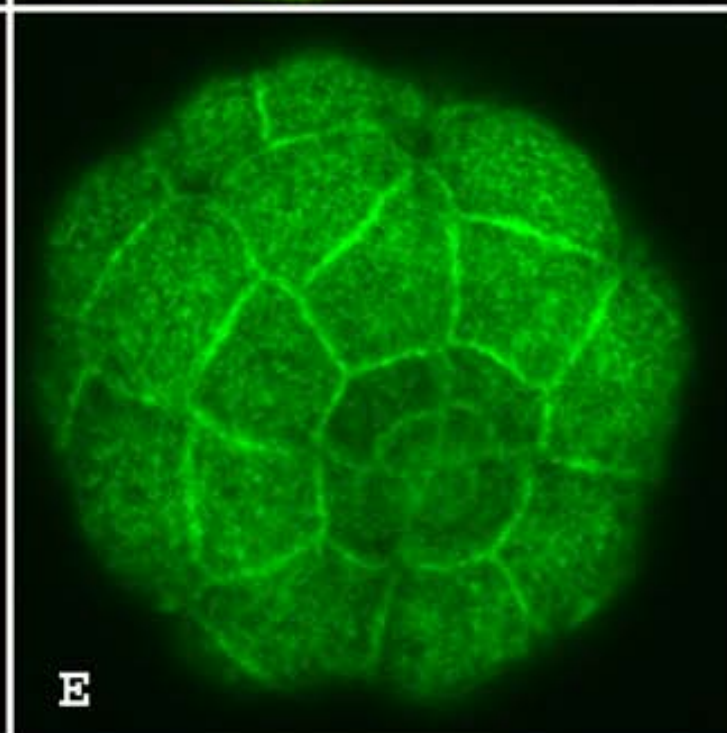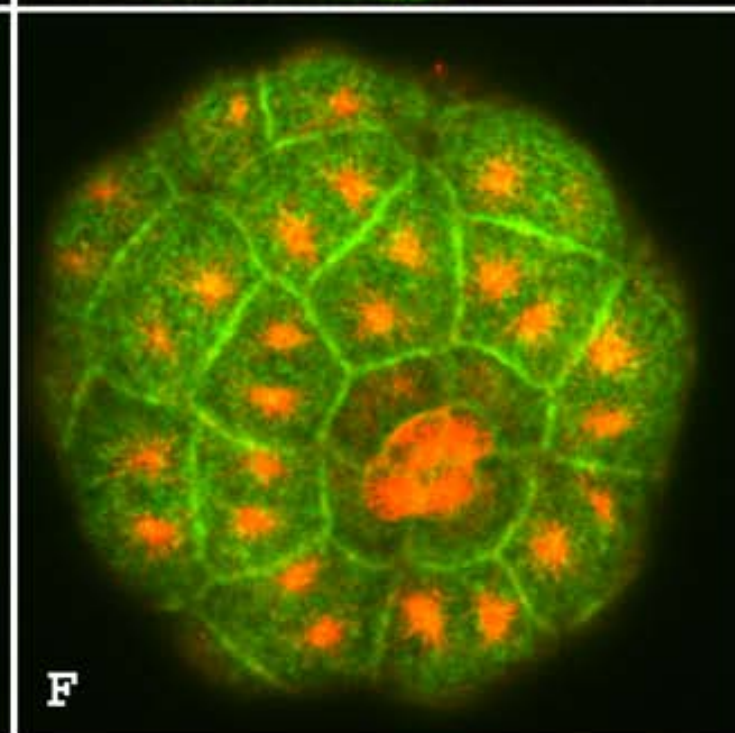

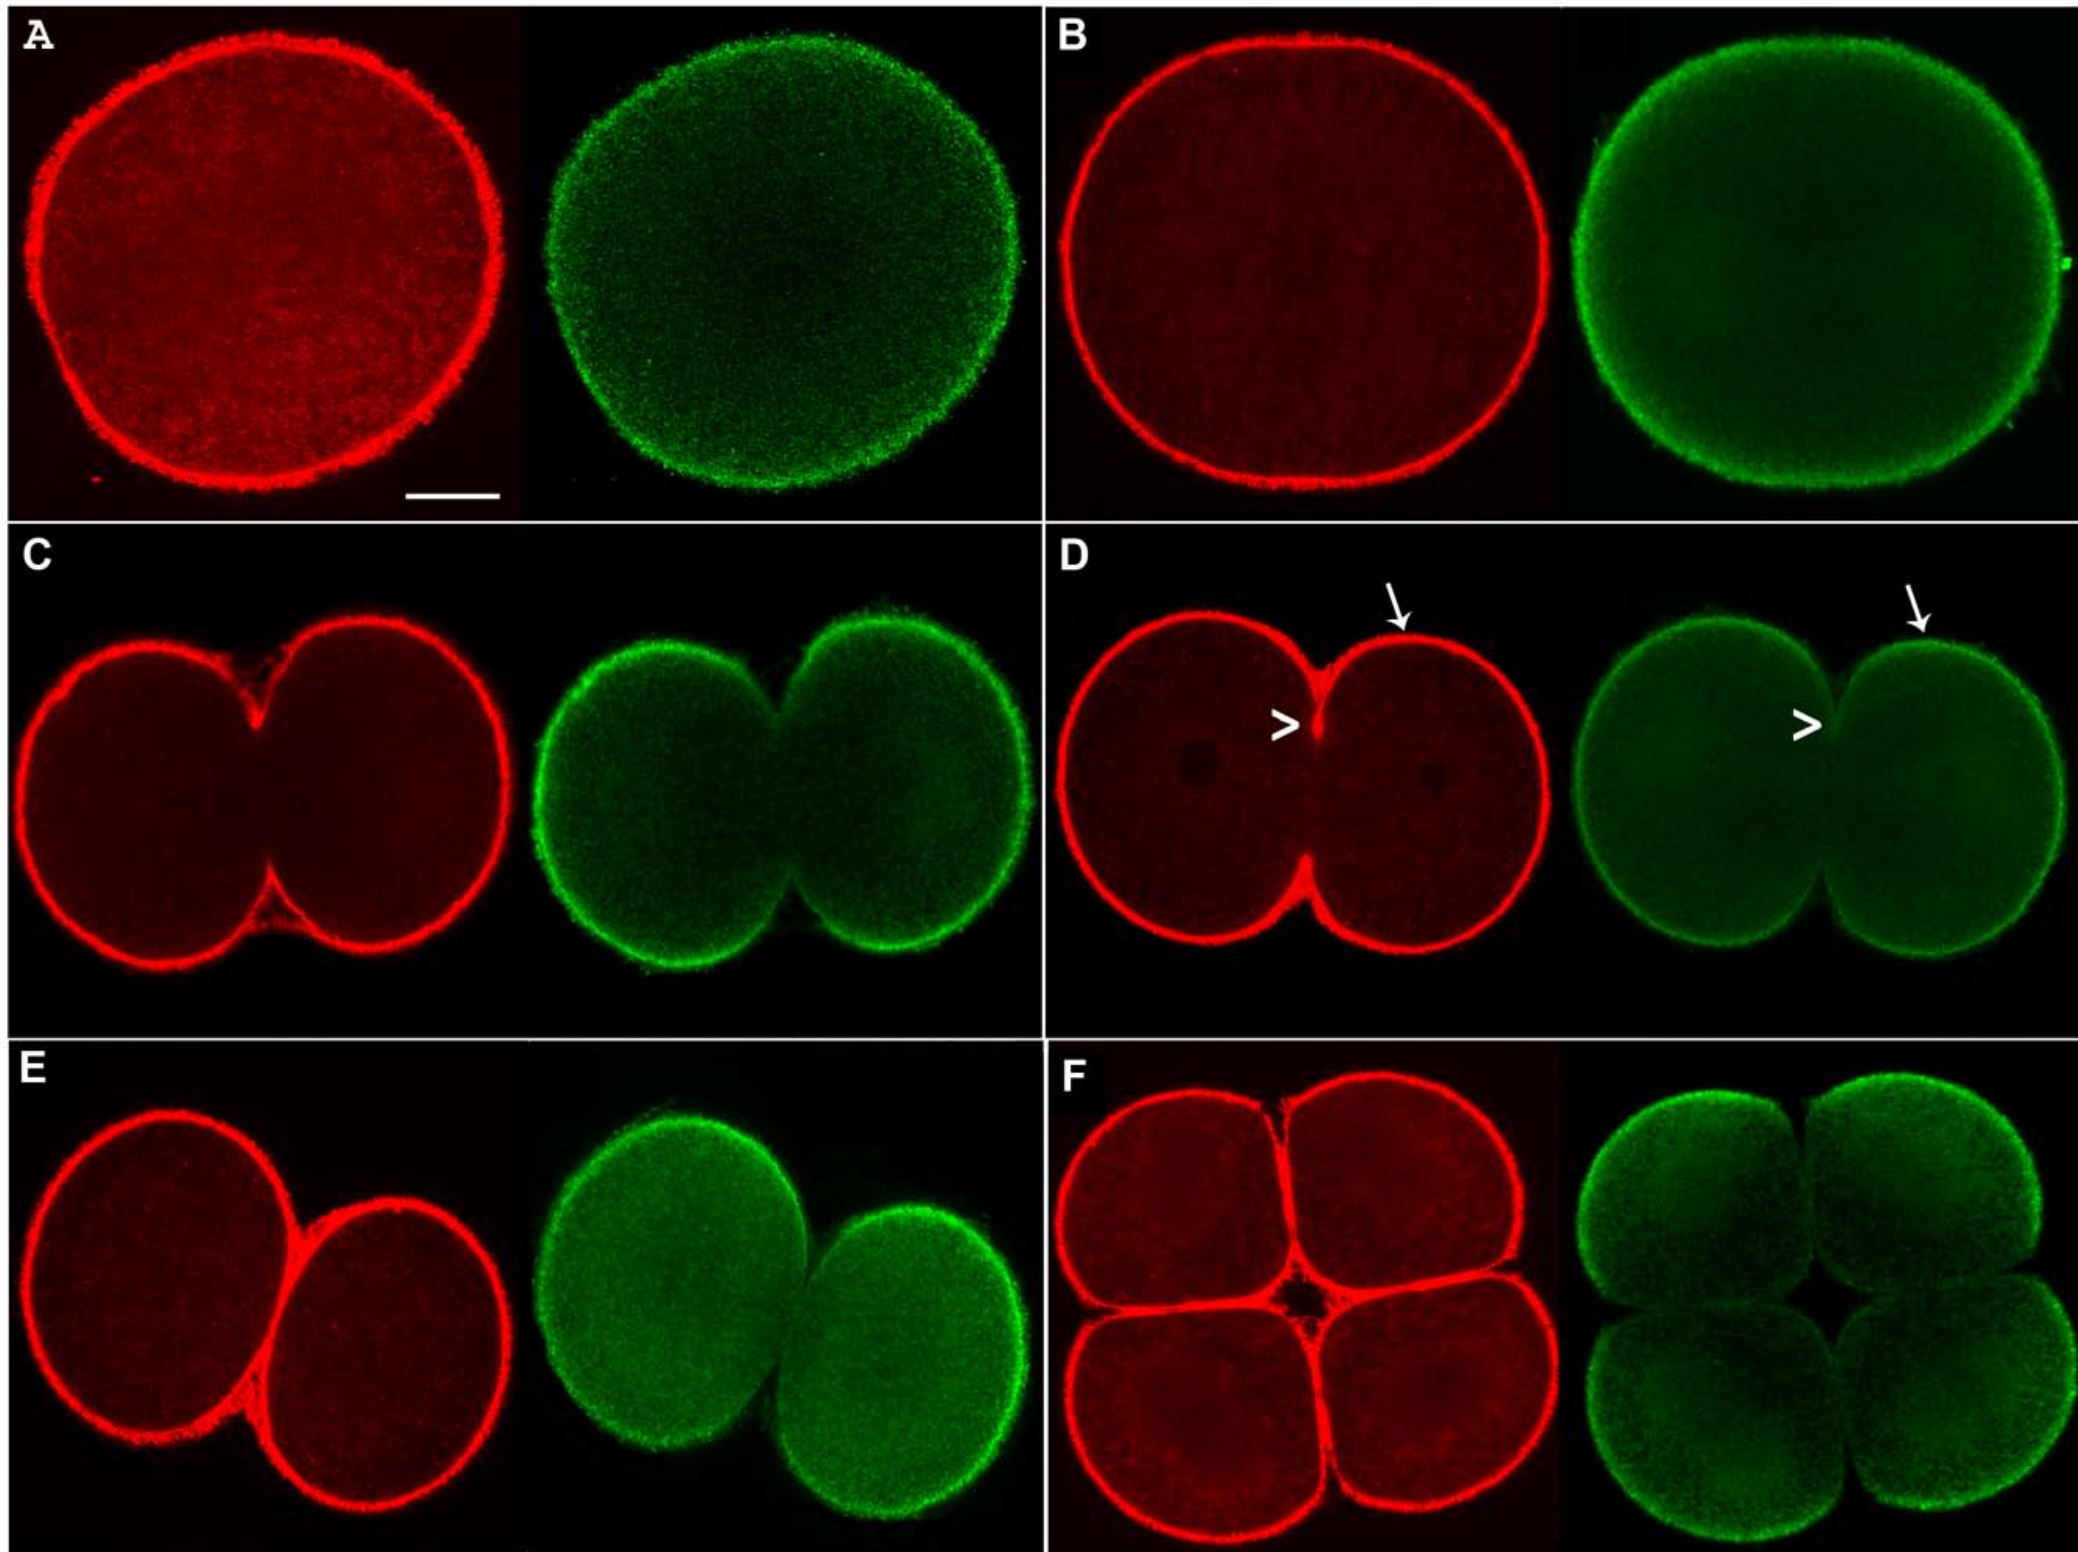

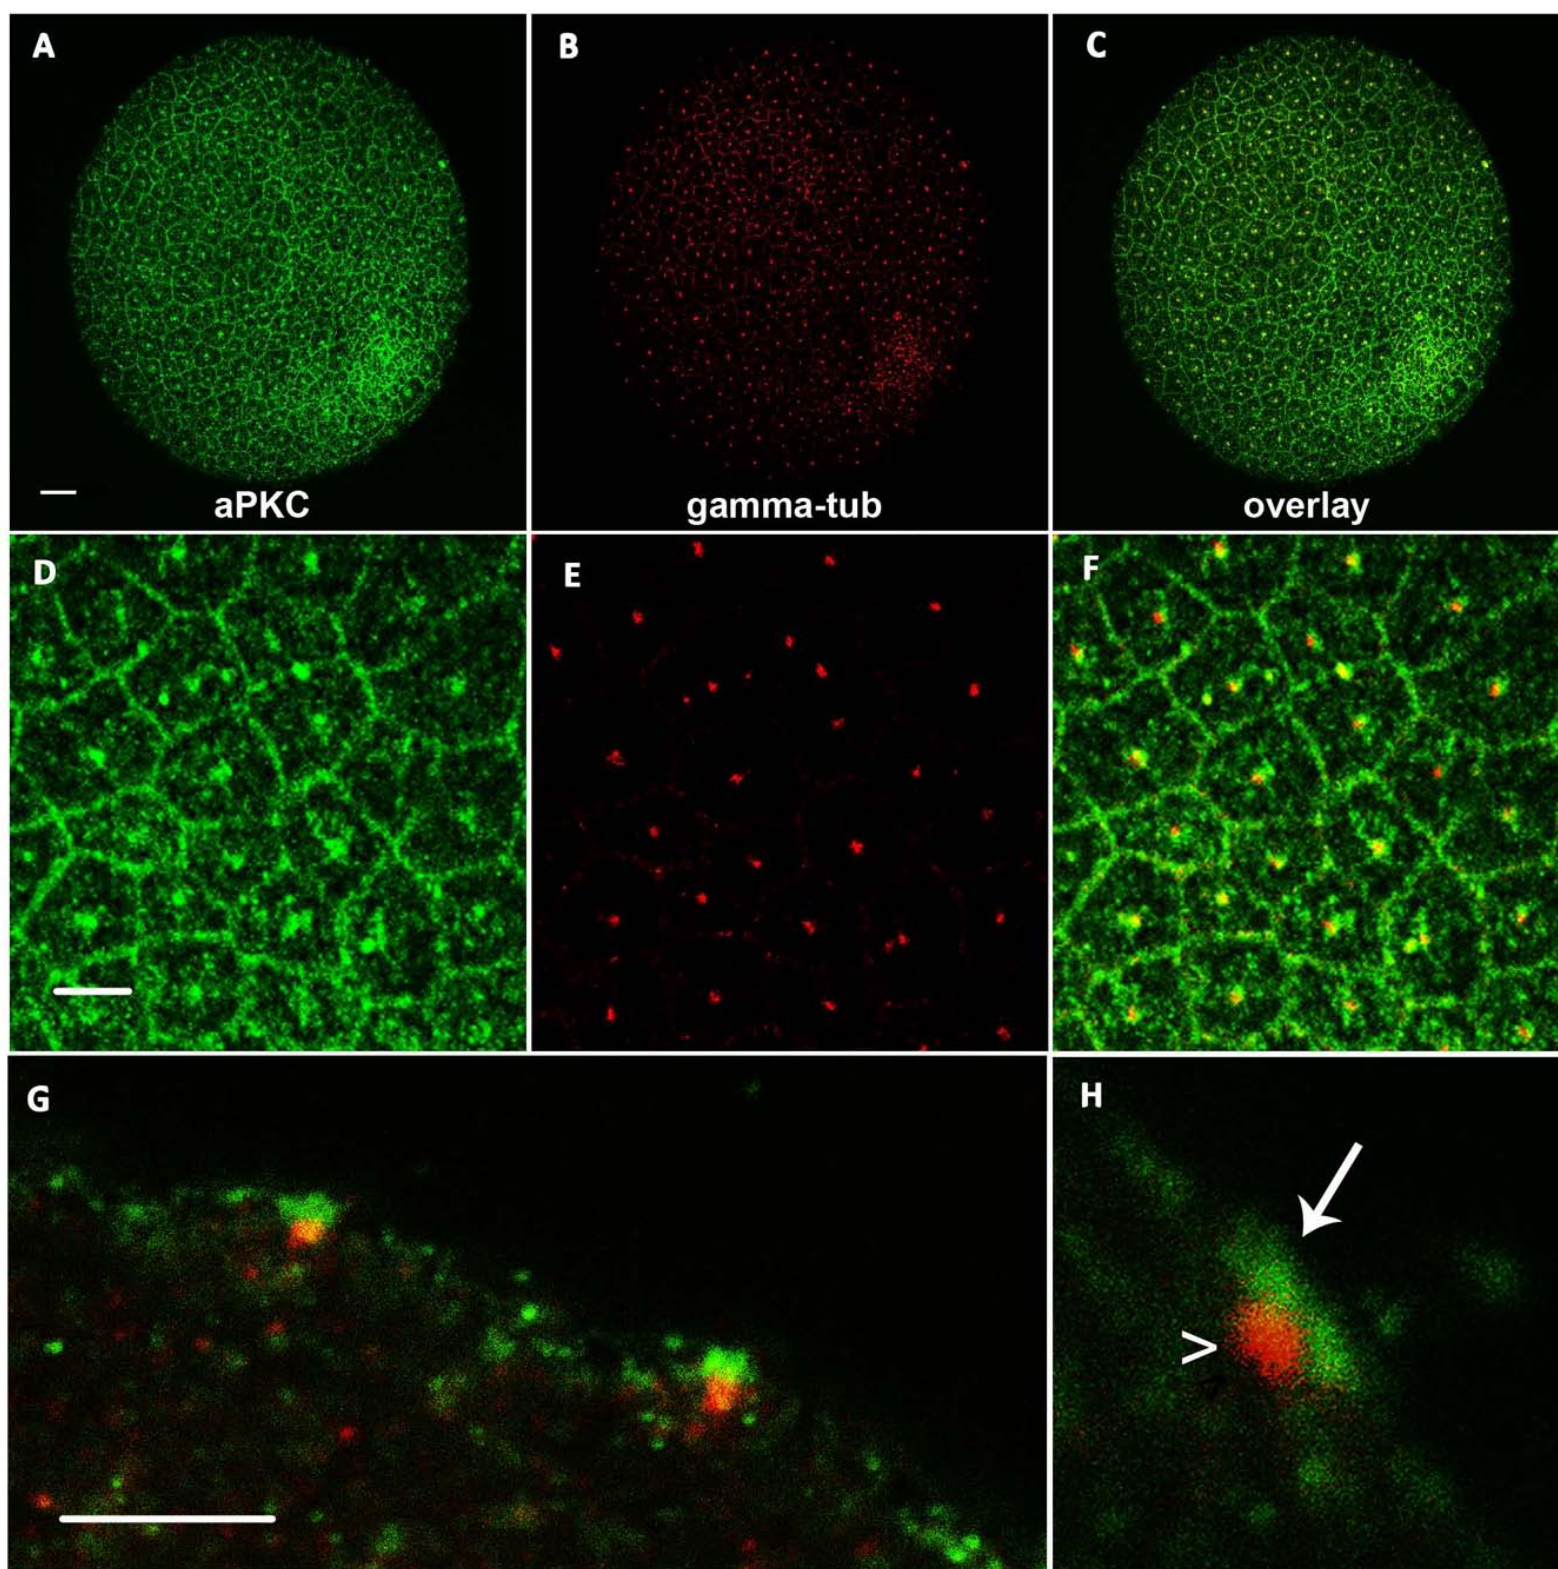

Supplement: E10-10-0844_1.pdf [file E10-10-0844_1.pdf]
